# Supplementary material for: Modulation of lipid biosynthesis contributes to stress resistance and longevity of C. elegans mutants
Source: PubMed Central journal article supplement (PMC3082008; doi:10.18632/aging.100275), 2011-02-25
Supplement: aging-03-125-s001.pdf [file aging-03-125-s001.pdf]

## SUPPLEMENTAL TABLES

**Supplemental Table S1. Survival (Life Table) Summary for Longevity-Mutant Strains**

| Strain | Genotype | Median Adult Lifespan (d) | Rel. Median Lifespan | Mean Adult Lifespan (d) ±SEM | Rel. Mean Lifespan | N (deaths counted) | C (worms censored) | Diff. from N2, Cox-Mantel log-rank P< |
|--------|----------|---------------------------|----------------------|------------------------------|--------------------|--------------------|--------------------|---------------------------------------|
| N2DRM  | a        | 18.0                      | 0.97                 | 17.9±0.8                     | 0.98               | 31                 | 4                  | —                                     |
|        | b        | 19.0                      | 1.03                 | 18.7±0.8                     | 1.02               | 22                 | 13                 |                                       |
| SR803  | a        | 19.0                      | 1.03                 | 19.3±0.7                     | 1.05               | 33                 | 2                  | N.S.                                  |
|        | b        | 19.0                      | 1.03                 | 18.9±0.7                     | 1.03               | 31                 | 4                  |                                       |
| SR801  | a        | 21.0                      | 1.14                 | 20.5±0.8                     | 1.12               | 26                 | 7                  | 0.04                                  |
|        | b        | 21.0                      | 1.14                 | 19.6±0.8                     | 1.07               | 25                 | 10                 |                                       |
| SR800  | a        | 21.0                      | 1.14                 | 24.8±2.3                     | 1.36               | 14                 | 20                 | 0.001                                 |
|        | b        | 23.5                      | 1.27                 | 24.6±1.4                     | 1.34               | 22                 | 12                 |                                       |
| SR806  | a        | 41.9                      | 2.26                 | 37.8±2.0                     | 2.07               | 29                 | 5                  | <1E-10                                |
|        | b        | 41.9                      | 2.26                 | 39.5±1.7                     | 2.16               | 29                 | 6                  |                                       |
| SR807  | a        | 30.1                      | 1.63                 | 29.9±1.5                     | 1.63               | 31                 | 4                  | <1E-10                                |
|        | b        | 30.1                      | 1.63                 | 30.4±1.2                     | 1.66               | 33                 | 2                  |                                       |
| N2DRM  | a        | 15.5                      | 0.95                 | 15.1±0.6                     | 0.94               | 36                 | 6                  | —                                     |
|        | b        | 17.3                      | 1.05                 | 17.2±0.7                     | 1.06               | 33                 | 8                  |                                       |
| SR808  | a        | 150.4                     | 9.2                  | 136.4±16.3                   | 8.5                | 15                 | 33                 | <1E-15                                |
|        | b        | 161.6                     | 9.9                  | 170.2±12.0                   | 10.5               | 14                 | 42                 |                                       |
| N2DRM  | a        | 17.5                      | 0.94                 | 17.2±0.9                     | 0.99               | 27                 | 3                  | —                                     |
|        | b        | 19.6                      | 1.06                 | 17.5±1.0                     | 1.01               | 29                 | 1                  |                                       |
| SR807  | a        | 33.5                      | 1.81                 | 27.8±1.8                     | 1.60               | 21                 | 8                  | <1E-4                                 |
|        | b        | 26.5                      | 1.43                 | 28.2±1.2                     | 1.63               | 21                 | 9                  |                                       |
| SR819  | a        | 19.6                      | 1.06                 | 17.8±0.8                     | 1.03               | 28                 | 2                  | N.S.                                  |
|        | b        | 19.6                      | 1.06                 | 19.3±0.6                     | 1.11               | 25                 | 5                  |                                       |
| SR820  | a        | 19.6                      | 1.06                 | 18.5±0.9                     | 1.07               | 28                 | 2                  | 0.04                                  |
|        | b        | 19.6                      | 1.06                 | 19.5±0.6                     | 1.12               | 27                 | 3                  |                                       |

Relative median and relative mean adult lifespans are ratios of each group's value over the mean of N2DRM controls.

Data from duplicate experiments were combined prior to testing of significance. \*Data from [7]. N.S., not significant.

**Supplemental Table S2. Survival (Life Table) Summary for N2DRM Worms Exposed to RNAi**

| RNAi Added           | Median Adult Lifespan (days at 20°C) | Mean Adult Lifespan (days) ±SD | Relative Lifespan (Mean/N2) | N (deaths counted) | C (worms censored) | Diff. from N2: Cox-Mantel log-rank P< |
|----------------------|--------------------------------------|--------------------------------|-----------------------------|--------------------|--------------------|---------------------------------------|
| Feeding Vector       | 18.7                                 | 19.6±0.7                       | —                           | 21                 | 14                 | --                                    |
| <i>elo-1</i>         | 22.0                                 | 21.8±0.6                       | 1.11                        | 27                 | 8                  | 0.02                                  |
| <i>elo-2</i>         | 20.1                                 | 21.3±0.8                       | 1.09                        | 28                 | 7                  | 0.04                                  |
| <i>elo-5</i>         | 18.5                                 | 20.2±0.6                       | 1.03                        | 24                 | 11                 | N.S.                                  |
| <i>fat-4</i>         | 24.6                                 | 24.5±0.7                       | 1.25                        | 26                 | 8                  | 4E-5                                  |
| <i>elo-1 + elo-2</i> | 21.5                                 | 22.5±0.9                       | 1.15                        | 26                 | 9                  | 0.004                                 |
| <i>fat-6 + fat-7</i> | 22.4                                 | 23.2±0.9                       | 1.18                        | 23                 | 12                 | 0.001                                 |
| <i>elo-1 + elo-4</i> | 22.2                                 | 21.9±0.7                       | 1.12                        | 26                 | 9                  | 0.006                                 |

**Supplemental Table S3a. Fatty acid composition of isogenic *C. elegans* strains of varying lifespan**  
*(N.B.: double-mutant control strains, not shown here, were included to determine correlation coefficients)*

| Median Lifespan:  |                         | ~1X                   | 1         | 1.14X                | 1.21X               | 1.63X               | 2.3X                | 9.6X               | Pearson        |       | Pearson          |       | Rank-Order       |                |                  |
|-------------------|-------------------------|-----------------------|-----------|----------------------|---------------------|---------------------|---------------------|--------------------|----------------|-------|------------------|-------|------------------|----------------|------------------|
| Genotype:         |                         | <i>old-1(zls3000)</i> | Wild Type | <i>eat-18(ad820)</i> | <i>unc-31(e928)</i> | <i>age-1(hx546)</i> | <i>daf-2(e1370)</i> | <i>age-1(mg44)</i> | Correlation v. |       | Correlation v.   |       | Correlation      |                |                  |
| Strain (Biol. N): |                         | SR803 (2)             | N2DRM (5) | SR801 (2)            | SR800 (2)           | SR807 (5)           | SR806 (3)           | SR808 (4)          | logLS (N=10)   |       | logLS (N=36)     |       | v. LS (N=36)     |                |                  |
|                   |                         | Mean ±SD              | Mean ±SD  | Mean ±SD             | Mean ±SD            | Mean ±SD            | Mean ±SD            | Mean ±SD           | Mean ±SD       | R     | P <sub>R</sub> ≤ | R     | P <sub>R</sub> ≤ | R <sub>S</sub> | P <sub>R</sub> ≤ |
| immBC             | C15:0 <i>iso</i>        | 3.6 0.0               | 4.1 0.5   | 2.4 0.3              | 3.6 0.8             | 3.9 0.6             | 4.4 1.3             | 4.7 1.3            | 0.63           | 0.06  | <b>0.41</b>      | 0.02  | 0.23             | —              |                  |
|                   | C17:0 <i>iso</i>        | 5.2 0.02              | 5.8 0.5   | 3.7 0.1              | 4.3 0.2             | 5.3 0.6             | 5.1 0.2             | 5.1 0.8            | -0.07          | —     | -0.18            | —     | -0.21            | —              |                  |
| SATURATED FAs     | C14:0                   | 0.9 0.1               | 1.0 0.2   | 1.3 0.05             | 1.1 0.2             | 1.0 0.2             | 1.5 0.6             | 3.0 1.3            | <b>0.96</b>    | 1E-5  | <b>0.82</b>      | 1E-9  | <b>0.53</b>      | 8E-4           |                  |
|                   | C16:0                   | 4.0 0.2               | 3.8 0.6   | 4.5 0.4              | 4.6 1.5             | 4.0 0.2             | 4.7 1.0             | 4.8 0.6            | <b>0.67</b>    | 0.04  | <b>0.47</b>      | 0.004 | <b>0.45</b>      | 0.007          |                  |
|                   | ΣSC-SFAs (C14-C16)      | 8.4 0.3               | 8.9 1.0   | 8.3 0.1              | 9.3 2.6             | 8.9 0.8             | 10.6 2.9            | 12.7 2.7           | <b>0.96</b>    | 2E-5  | <b>0.68</b>      | 5E-6  | <b>0.42</b>      | 0.01           |                  |
|                   | C18:0                   | 10.47 0.8             | 9.8 1.9   | 11.2 0.2             | 11.6 1.9            | 10.3 0.7            | 9.4 2.3             | 6.5 1.7            | <b>-0.75</b>   | 0.02  | <b>-0.57</b>     | 3E-4  | -0.23            | —              |                  |
|                   | C20:0                   | 4.0 0.1               | 3.3 1.0   | 4.1 0.3              | 4.7 1.2             | 3.5 1.7             | 2.7 0.9             | 1.5 0.8            | <b>-0.81</b>   | 0.005 | <b>-0.52</b>     | 0.001 | <b>-0.40</b>     | 0.02           |                  |
|                   | C22:0                   | 1.0 0.1               | 0.9 0.3   | 1.1 0.2              | 1.0 0.2             | 1.0 0.3             | 0.8 0.1             | 0.5 0.1            | <b>-0.91</b>   | 3E-4  | <b>-0.60</b>     | 1E-04 | <b>-0.43</b>     | 0.01           |                  |
|                   | ΣLC-SFAs (C18-C22)      | 15.4 1.0              | 14.0 2.8  | 16.4 0.3             | 17.3 3.3            | 14.7 2.6            | 12.9 2.8            | 8.5 2.4            | <b>-0.80</b>   | 0.006 | <b>-0.60</b>     | 1E-04 | <b>-0.34</b>     | 0.05           |                  |
| MUFAs             | C16:1Δ9(n-7)            | 2.8 0.1               | 2.7 0.4   | 2.4 0.1              | 2.8 0.2             | 2.2 0.9             | 4.2 0.9             | 10.6 1.6           | <b>0.95</b>    | 3E-5  | <b>0.93</b>      | 7E-16 | <b>0.53</b>      | 0.001          |                  |
|                   | C18:1Δ11(n-7)           | 25.6 0.7              | 27.7 6.0  | 21.7 0.7             | 22.2 1.8            | 24.3 3.0            | 28.4 7.7            | 34.7 3.2           | <b>0.71</b>    | 0.02  | <b>0.55</b>      | 6E-04 | 0.25             | —              |                  |
|                   | C18:1Δ9(n-9)            | 0.3 0.01              | 0.7 0.1   | 0.8 0.2              | 0.8 0.7             | 0.6 0.2             | 0.7 0.5             | 1.0 0.1            | 0.52           | —     | 0.29             | —     | 0.19             | —              |                  |
|                   | C20:1Δ11(n-9)           | 1.3 0.1               | 0.9 0.5   | 0.9 0.06             | 0.9 0.4             | 0.7 0.3             | 1.0 0.7             | 0.7 0.2            | -0.51          | —     | -0.27            | —     | <b>-0.37</b>     | 0.03           |                  |
|                   | C22:1Δ13(n-9)           | 1.4 0.9               | 2.0 0.9   | 1.8 0.5              | 2.8 1.1             | 2.0 0.9             | 1.4 0.3             | 1.0 0.5            | -0.50          | —     | <b>-0.37</b>     | 0.03  | -0.15            | —              |                  |
|                   | Σ(MUFAs)                | 31.6 1.9              | 34.0 5.5  | 27.7 1.3             | 29.6 3.6            | 29.8 3.1            | 35.8 7.2            | 48.0 3.8           | <b>0.84</b>    | 0.002 | <b>0.74</b>      | 2E-7  | 0.28             | —              |                  |
| PUFAs             | C18:2(n-6)              | 6.7 0.3               | 7.6 2.0   | 7.4 0.8              | 6.1 1.2             | 7.1 1.0             | 6.9 0.2             | 7.2 0.8            | 0.08           | —     | 0.05             | —     | 0.09             | —              |                  |
|                   | C18:3(n-6)              | 2.1 0.2               | 2.1 0.5   | 2.3 0.2              | 2.0 0.2             | 2.1 0.9             | 1.8 0.3             | 1.2 0.3            | <b>-0.82</b>   | 0.004 | <b>-0.51</b>     | 0.002 | <b>-0.39</b>     | 0.02           |                  |
|                   | C20:2(n-6)              | 1.5 0.05              | 1.4 0.6   | 1.7 0.3              | 1.4 0.7             | 1.0 0.3             | 1.3 0.5             | 1.6 0.2            | -0.01          | —     | 0.05             | —     | -0.06            | —              |                  |
|                   | C20:3(n-6)              | 4.4 0.2               | 3.6 0.6   | 4.9 0.1              | 4.5 0.7             | 4.3 0.3             | 4.8 1.3             | 3.5 0.7            | -0.24          | —     | -0.18            | —     | 0.03             | —              |                  |
|                   | C20:4(n-6)              | 4.4 0.06              | 3.9 0.9   | 4.1 0.2              | 4.2 0.8             | 4.2 0.7             | 3.4 0.7             | 2.7 0.8            | <b>-0.89</b>   | 5E-4  | <b>-0.55</b>     | 6E-04 | <b>-0.46</b>     | 0.005          |                  |
|                   | C20:4(n-3)              | 5.3 0.07              | 4.5 1.0   | 6.9 0.1              | 5.9 0.4             | 5.3 0.3             | 5.1 1.4             | 3.2 0.9            | <b>-0.64</b>   | 0.05  | <b>-0.54</b>     | 8E-04 | -0.26            | —              |                  |
|                   | C20:5(n-3)              | 14.9 0.04             | 14.3 2.4  | 16.5 0.1             | 15.4 1.4            | 17.3 1.3            | 12.3 1.0            | 6.4 0.9            | <b>-0.85</b>   | 0.002 | <b>-0.80</b>     | 6E-09 | <b>-0.43</b>     | 0.01           |                  |
|                   | Σ(PUFAs) ≥3 desat sites | 31.2 0.3              | 28.4 4.8  | 34.9 0.4             | 32.1 0.1            | 33.2 1.2            | 27.4 2.9            | 17.0 3.2           | <b>-0.82</b>   | 0.004 | <b>-0.77</b>     | 6E-08 | <b>-0.36</b>     | 0.03           |                  |

### Supplemental Table S3b. Fatty-acid ratios implying lipid-synthetic activities

(N.B.: double-mutant control strains, not shown here, were included to determine correlation coefficients)

| Median Adult Lifespan:               | ~1X                   | 1          | 1.14X                | 1.21X               | 1.63X               | 2.3X                | 9.6X               | Pearson        |       | Pearson          |       | Rank-Order       |                |                  |
|--------------------------------------|-----------------------|------------|----------------------|---------------------|---------------------|---------------------|--------------------|----------------|-------|------------------|-------|------------------|----------------|------------------|
| Genotype:                            | <i>old-1(zls3000)</i> | WT (N2DRM) | <i>eat-18(ad820)</i> | <i>unc-31(e928)</i> | <i>age-1(hx546)</i> | <i>daf-2(e1370)</i> | <i>age-1(mg44)</i> | Correlation to |       | Correlation to   |       | Correlation      |                |                  |
| Strain(Biol. N):                     | SR803 (2)             | N2DRM (5)  | SR801 (2)            | SR800 (2)           | SR807 (5)           | SR806 (3)           | SR808 (4)          | log LS (N=10)  |       | log LS (N=36)    |       | to LS (N=36)     |                |                  |
|                                      | Mean ±SD              | Mean ±SD   | Mean ±SD             | Mean ±SD            | Mean ±SD            | Mean ±SD            | Mean ±SD           | Mean ±SD       | R     | P <sub>R</sub> ≤ | R     | P <sub>R</sub> ≤ | R <sub>s</sub> | P <sub>R</sub> ≤ |
| ACL                                  | 18.2 0.2              | 18.0 0.2   | 18.2 0.1             | 17.9 0.1            | 18.1 0.2            | 18.0 0.1            | 17.6 0.2           | -0.87          | 0.002 | -0.63            | 5E-5  | -0.49            | 0.003          |                  |
| DBI                                  | 181.4 0.6             | 174.2 12.0 | 194.6 2.6            | 181.6 10.2          | 189.5 6.9           | 167.5 7.4           | 135.2 9.0          | -0.84          | 0.003 | -0.78            | 2E-8  | -0.40            | 0.02           |                  |
| PI                                   | 150.8 0.4             | 140.8 19.8 | 167.8 3.0            | 154.2 7.0           | 163.3 7.6           | 130.2 9.7           | 81.5 11.9          | -0.85          | 0.002 | -0.80            | 7E-9  | -0.39            | 0.02           |                  |
| ω3/ω6 ratio                          | 1.06 0.04             | 1.03 0.24  | 1.15 0.06            | 1.18 0.09           | 1.21 0.08           | 0.96 0.11           | 0.60 0.08          | -0.81          | 0.005 | -0.70            | 2E-6  | -0.37            | 0.03           |                  |
| <b>Δ9 Desaturase Activity</b>        |                       |            |                      |                     |                     |                     |                    |                |       |                  |       |                  |                |                  |
| C16:1Δ9/16:0                         | 0.72 0.08             | 0.71 0.13  | 0.54 0.02            | 0.63 0.16           | 0.54 0.25           | 0.88 0.02           | 2.23 0.29          | 0.93           | 1E-4  | 0.90             | 5E-14 | 0.35             | 0.04           |                  |
| C18:1Δ9/18:0                         | 0.028 0.003           | 2.98 1.06  | 1.93 0.02            | 1.96 0.48           | 2.37 0.40           | 3.30 1.81           | 5.60 1.58          | 0.79           | 0.007 | 0.61             | 8E-5  | 0.28             | —              |                  |
| Total Δ9 activity                    | 0.22 0.03             | 0.25 0.04  | 0.20 0.01            | 0.23 0.08           | 0.19 0.06           | 0.34 0.03           | 1.05 0.24          | 0.94           | 5E-5  | 0.91             | 4E-14 | 0.35             | 0.04           |                  |
| <b>Δ5 Desaturase Activity</b>        |                       |            |                      |                     |                     |                     |                    |                |       |                  |       |                  |                |                  |
| C20:4(n-6)/C20:3(n-6)                | 1.00 0.07             | 1.10 0.14  | 0.83 0.01            | 0.92 0.03           | 0.99 0.22           | 0.75 0.27           | 0.75 0.09          | -0.71          | 0.03  | -0.44            | 0.008 | -0.56            | 5E-4           |                  |
| <b>Δ6 Desaturase Activity</b>        |                       |            |                      |                     |                     |                     |                    |                |       |                  |       |                  |                |                  |
| C18:3(n-6)/C18:2(n-6)                | 0.31 0.02             | 0.29 0.11  | 0.32 0.06            | 0.33 0.10           | 0.30 0.11           | 0.26 0.04           | 0.17 0.07          | -0.75          | 0.02  | -0.50            | 0.003 | -0.37            | 0.03           |                  |
| <b>Omega-3 Desaturase Activities</b> |                       |            |                      |                     |                     |                     |                    |                |       |                  |       |                  |                |                  |
| C20:5(n-3)/C20:4(n-6)                | 3.37 0.04             | 3.70 0.52  | 4.02 0.13            | 3.79 1.04           | 4.23 0.77           | 3.83 1.11           | 2.56 0.70          | -0.71          | 0.02  | -0.41            | 0.02  | -0.15            | —              |                  |
| C20:4(n-3)/C20:3(n-6)                | 1.21 0.08             | 1.27 0.16  | 1.40 0.01            | 1.34 0.31           | 1.25 0.06           | 1.08 0.12           | 0.91 0.13          | -0.88          | 8E-4  | -0.69            | 3E-6  | -0.55            | 6E-4           |                  |
| <b>Elongase Activities</b>           |                       |            |                      |                     |                     |                     |                    |                |       |                  |       |                  |                |                  |
| C16:0/C14:0                          | 4.57 0.02             | 3.85 0.72  | 3.46 0.15            | 4.17 0.56           | 4.40 1.15           | 3.25 0.72           | 1.66 0.58          | -0.88          | 8E-4  | -0.70            | 2E-06 | -0.52            | 0.002          |                  |
| C18:0/C16:0                          | 2.62 0.04             | 2.58 0.29  | 2.47 0.25            | 2.57 0.44           | 2.57 0.23           | 1.99 0.24           | 1.41 0.54          | -0.94          | 8E-5  | -0.76            | 7E-8  | -0.51            | 0.002          |                  |
| C20:0/C18:0                          | 0.39 0.02             | 0.33 0.07  | 0.37 0.02            | 0.40 0.03           | 0.33 0.15           | 0.29 0.10           | 0.22 0.07          | -0.86          | 0.002 | -0.47            | 0.005 | -0.39            | 0.02           |                  |
